# Supplementary material for: ATG13 dynamics in nonselective autophagy and mitophagy: insights from live imaging studies and mathematical modeling
Source: Autophagy. 2020 Apr 22;17(5):1131–41. doi: 10.1080/15548627.2020.1749401 (PMC8143212; doi:10.1080/15548627.2020.1749401)
Supplement: Supplemental Material [file KAUP_A_1749401_SM1095.pdf]

# Supplementary Information for

ATG13 dynamics in non-selective autophagy and mitophagy: insights  
from live imaging studies and mathematical modelling.

Piero Dalle Pezze, Eleftherios Karanasios, Varvara Kandia, Maria Manifava, Simon A.  
Walker, Nicolas Gambardella Le Novère and Nicholas T. Ktistakis.

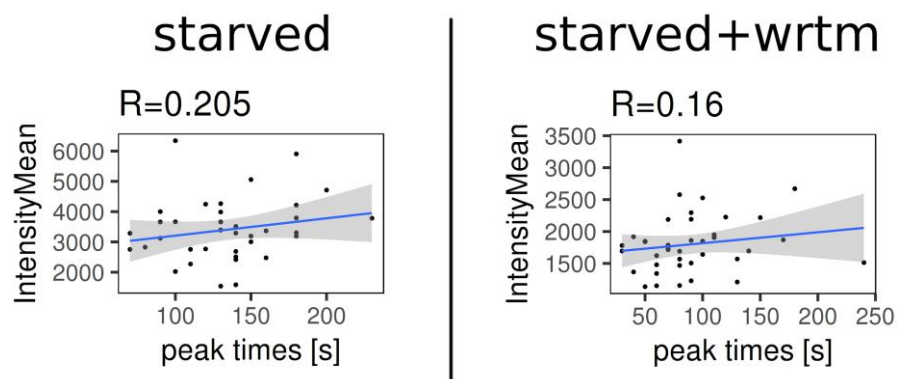

**Supplementary Figure S1. Peak times did not correlate with signal intensities for the non-selective autophagy data.**

No significant correlation was found between peak times and corresponding signal intensities for the starvation and starvation+wortmannin data sets in the non-selective autophagy.

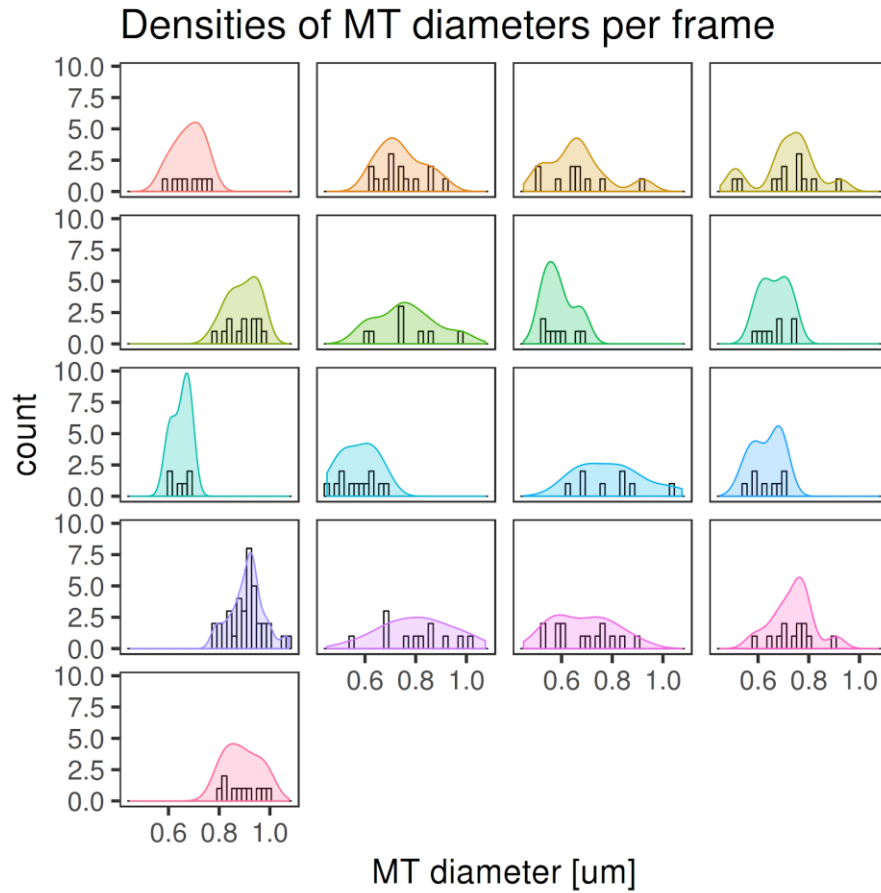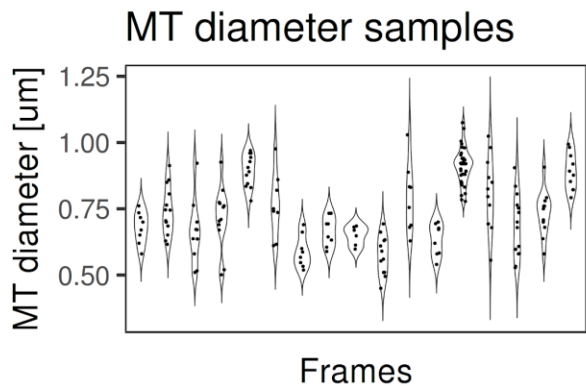

**Supplementary Figure S2. Mitochondrial diameter measurements for each frame.**

The diameter of the mitochondria engulfed by ATG13 was measured for each of the 17 time courses. The mean diameter for each frame was then computed.

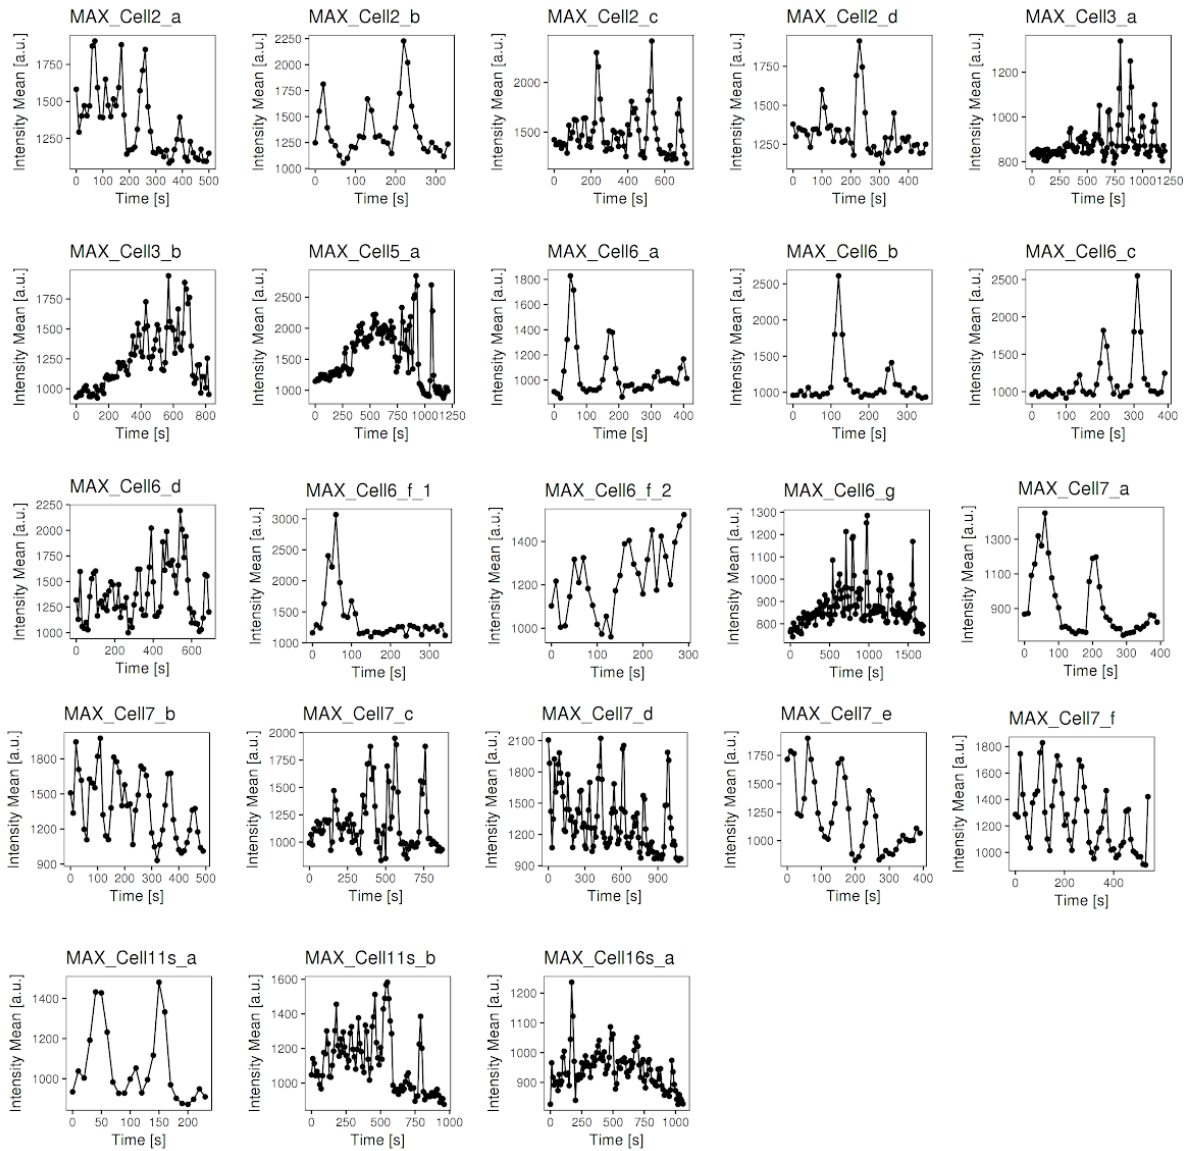

**Supplementary Figure S3. Raw quantified time courses for ATG13 for the mitophagy model.**

A total of 23 time courses were quantified from fluorescence large images. ATG13 accumulations/removals have similar lengths but the time between two peaks tend to increase over time. Due to this regularity, the time courses could have been synchronised.

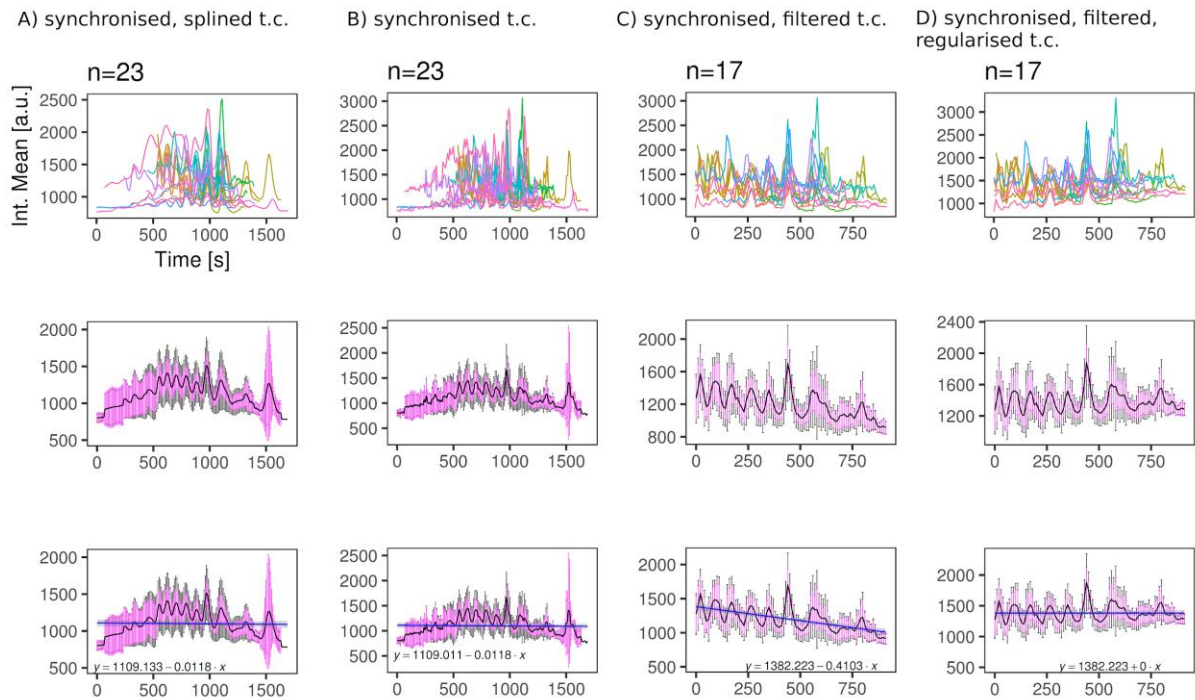

**Supplementary Figure S4. Synchronisation and filtering of ATG13 time courses for the mitophagy model.**

- A) ATG13 splined time courses were synchronised by overlapping the delays between peaks.
- B) The splined time courses were then replaced with the original ATG13 time courses.
- C) Six time courses were removed because they contained too much noise in their signal. Initial and later signals were cut off in order to have at least 3 repeats for each time point.
- D) The mean time course was regularised so that there was no signal decline over time. Each time course was adjusted based on this regularisation.
